# Supplementary material for: Aliovalent A-site engineered AgNbO3 lead-free antiferroelectric ceramics toward superior energy storage density
Source: Royal Society of Chemistry journal article supplement (doi:10.1039/c9ta02053e), 2019-01-01
Supplement: c9ta02053e1.pdf [file c9ta02053e1.pdf]

## Supporting Information

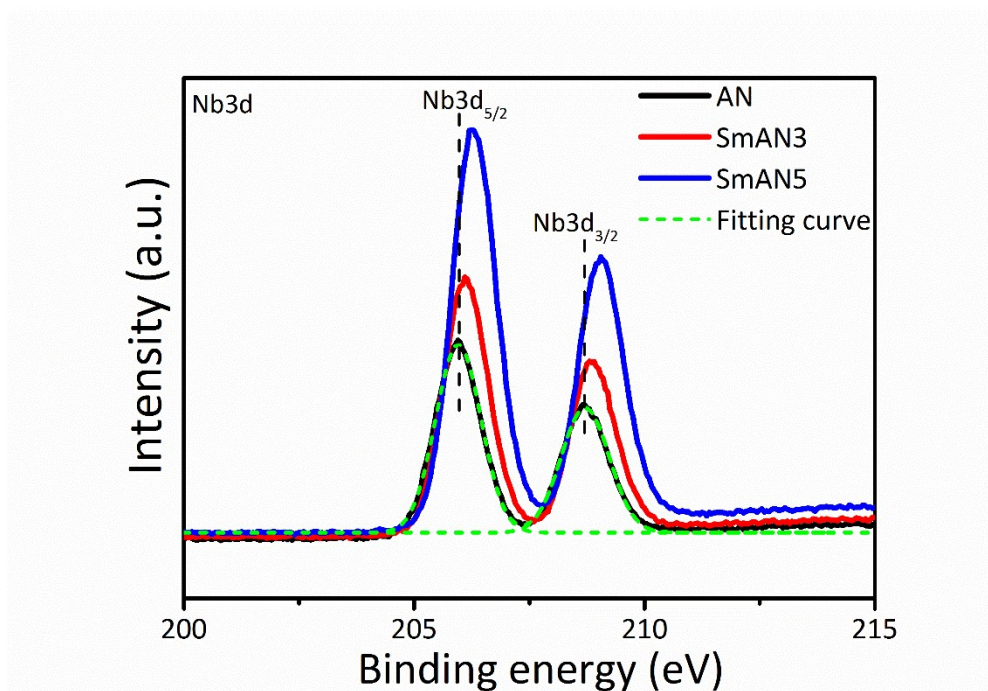

Figure S1. XPS spectra of Nb3d core level for the SmAN<sub>x</sub> ceramics with selected compositions.

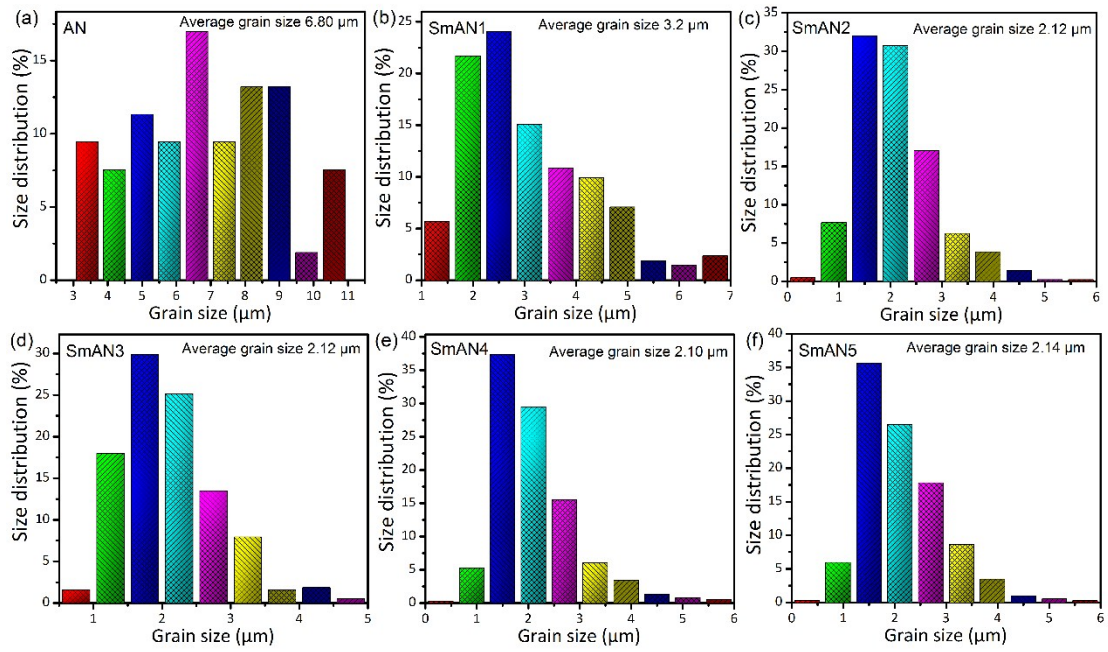

Figure S2. the grain size distributions of SmANx ceramics. (a)AN, (b) SmAN1, (c) SmAN2, (d) SmAN3, (e) SmAN4, and (f) SmAN6 ceramics.

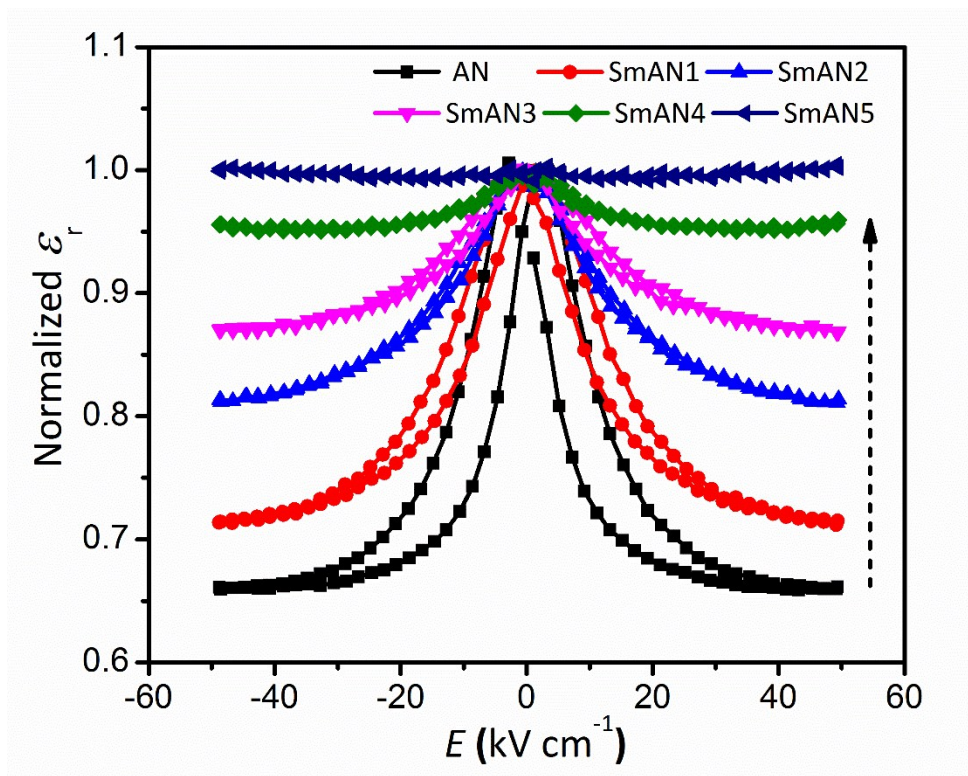

Figure S3. Normalized dielectric permittivity  $\epsilon_r$  as a function of electric field for the as-prepared SmANx ceramics.
